# Supplementary material
Source: PubMed Central journal article supplement (PMC8167890)
Supplement: NIHMS1701463-supplement-Supplementary_Material.pdf [file NIHMS1701463-supplement-Supplementary_Material.pdf]

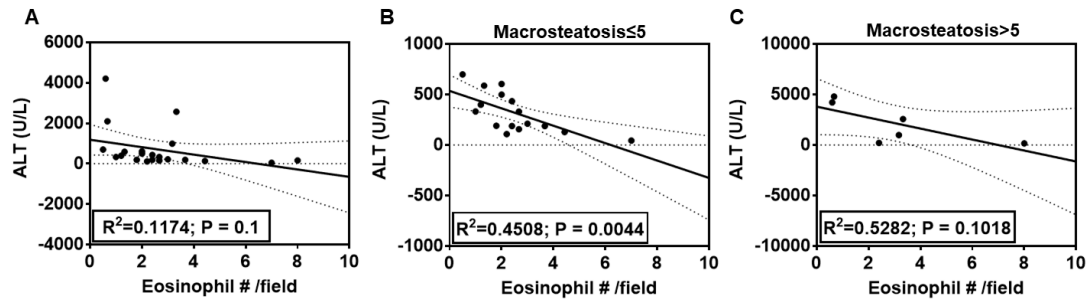

**Fig. S1. Correlation between hepatic eosinophil frequency and ALT concentration after orthotopic liver transplantation.** (A) The numbers of eosinophils in post-ischemia and reperfusion (IR) liver tissues were plotted against serum ALT concentration on day one after liver transplantation for all samples ( $n = 22$ ). (B) The numbers of eosinophils were plotted against serum ALT concentration for samples with donor liver macrosteatosis equal to or less than 5% ( $n = 16$ ). (C) The numbers of eosinophils were plotted against serum ALT concentration for samples with donor liver macrosteatosis greater than 5% ( $n = 6$ ).

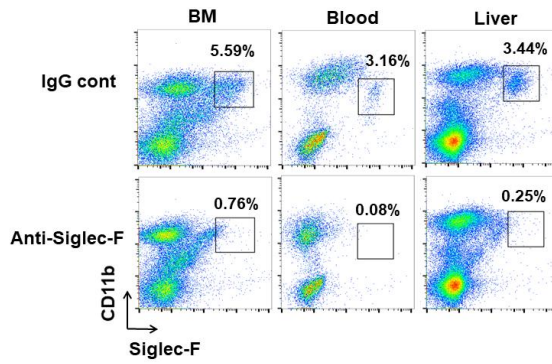

**Fig. S2. Anti-Siglec-F antibody effectively depletes eosinophils from the bone marrow (BM), blood, and liver.** Male C57BL/6 mice were injected with anti-Siglec-F antibody at 24 hours before liver ischemia. Control mice were injected with IgG. Eosinophils were measured by expression of CD11b and Siglec-F by flow cytometry at 4 hours post-reperfusion. Data represent results from 3 mice per group.

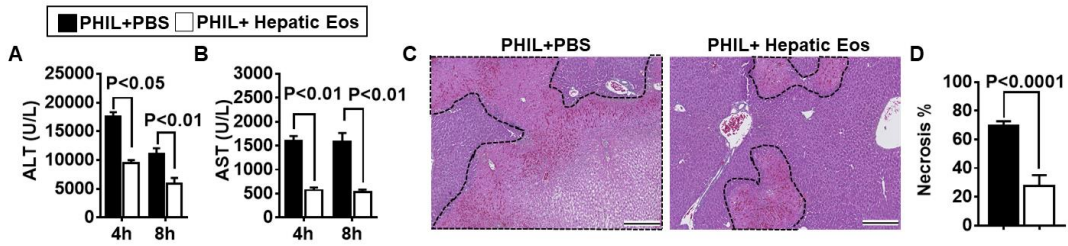

**Fig. S3. Eosinophils from IR-injured livers of WT mice can attenuate IR injury in eosinophil-deficient PHIL mice.** Liver eosinophils isolated from C57BL/6 mice at 24 hours after IR injury were adoptively transferred into PHIL mice ( $n = 3$ ) at 24 prior to IR surgery. Control PHIL mice were injected with PBS ( $n = 3$ ). Serum concentrations of ALT (**A**) and AST (**B**) were measured at 4 and 8 hours after reperfusion. Liver necrosis (scale bar, 200µm) was examined at 24 hours post-reperfusion (**C**) and quantified (**D**). A two-tailed unpaired Student's t tests with Welch's correction was performed in D. A two-way ANOVA was performed in A and B.

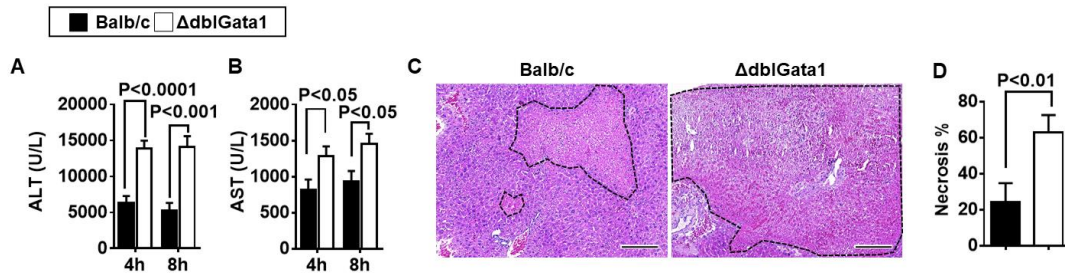

**Fig. S4.  $\Delta$ dblGata-1 mice develop exacerbated liver IR injury.** WT male Balb/c and eosinophil-deficient male  $\Delta$ dblGata-1 mice were subjected to hepatic IR surgery ( $n = 4$  mice per group). Serum concentrations of ALT (**A**) and AST (**B**) were measured at 4 and 8 hours after reperfusion. Liver necrosis (scale bar, 200μm) was examined at 24 hours post-reperfusion (**C**) and quantified (**D**). A two-tailed unpaired Student's t tests with Welch's correction was performed in D. A two-way ANOVA was performed in A and B.

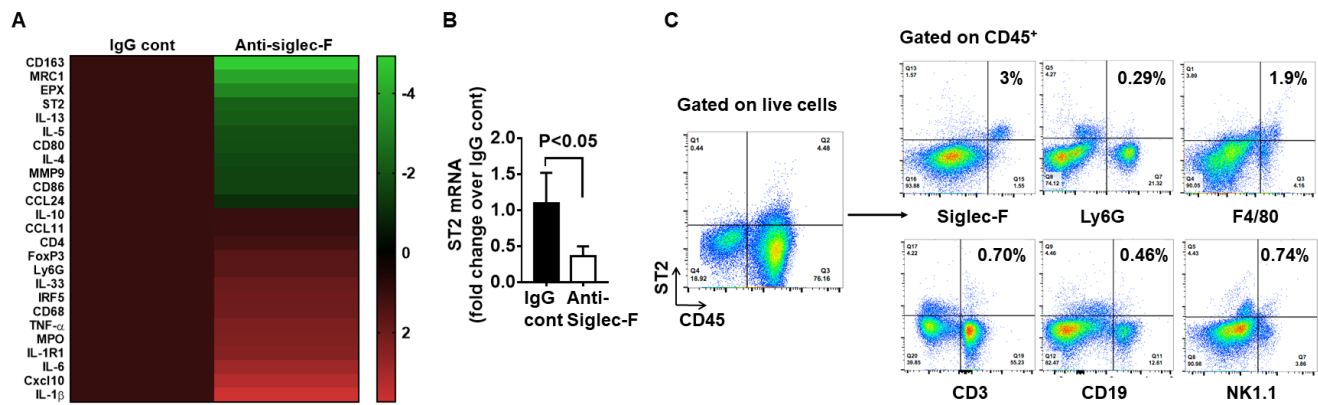

**Fig. S5. Hepatic eosinophils express ST2 during IR injury.** Male C57BL/6 mice were intraperitoneally injected with either IgG control or anti-Siglec-F antibody at 24 hours before liver ischemia. After 4 hours of reperfusion, liver non-parenchymal cells were isolated. **(A)** Microarray analysis was performed and a heatmap was generated by two-way hierarchical clustering. **(B)** mRNA expression of ST2 was measured by qPCR in male C57BL/6 mice 4 hours post IR injury ( $n = 4$  mice per group). **(C)** Liver non-parenchymal cells were stained for ST2 and markers to identify eosinophils (Siglec-F<sup>+</sup>), neutrophils (Ly6G<sup>+</sup>), macrophages (F4/80<sup>+</sup>), T lymphocytes (CD3<sup>+</sup>), B lymphocytes (CD19<sup>+</sup>), and NK or NKT cells (NK1.1<sup>+</sup>) ( $n = 7$  mice per group). A two-tailed unpaired Student's t tests with Welch's correction was performed in B.

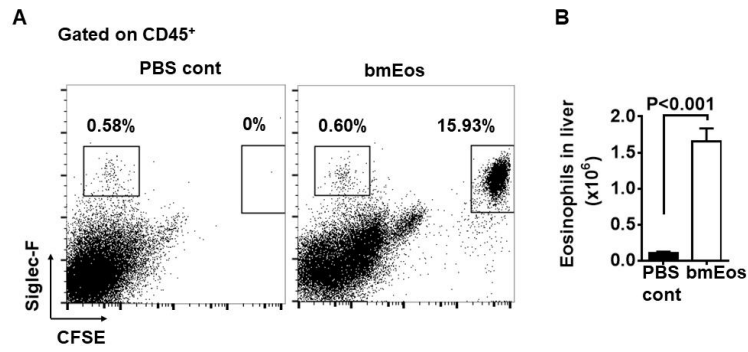

**Fig. S6. Adoptively transferred eosinophils accumulate in the liver.**  $ST2^{-/-}$  mice received an adoptive transfer of CFSE-labeled WT-bone marrow derived eosinophils (bmEos) prior to IR surgery. At 4 hours post-reperfusion, eosinophil accumulation in the liver was measured by flow cytometry (**A**) and quantified (**B**) ( $n = 4$  mice per group). A two-tailed unpaired Student's *t* tests with Welch's correction was performed in B.

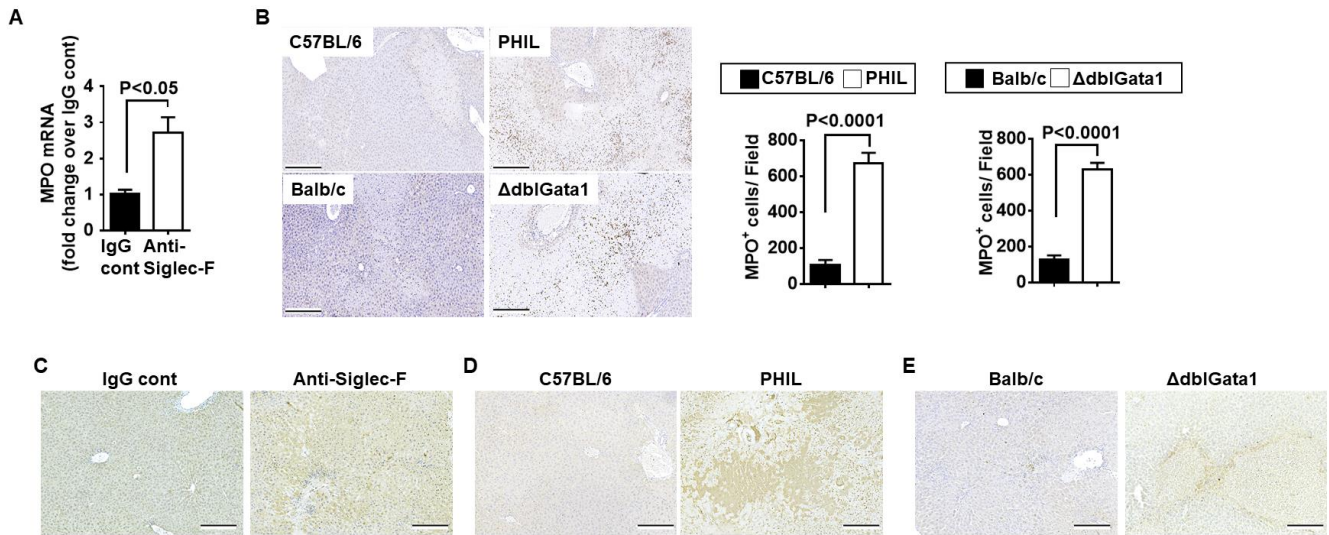

**Fig. S7. Increase of hepatic neutrophil accumulation in the absence of eosinophils.** (A) mRNA expression of myeloperoxidase (MPO) was measured by qPCR in liver non-parenchymal cells from anti-Siglec-F-treated and IgG-treated C57BL/6 mice after liver IR injury ( $n = 3$  in IgG-treated group and  $n = 4$  in anti-Siglec-F-treated group). (B) MPO immunohistochemical staining (scale bar, 200 $\mu$ m) was performed on liver sections to compare the numbers of neutrophils in eosinophil-deficient PHIL and  $\Delta$ dblGata1 with their WT counterparts at 24 hours post-reperfusion. (C-E) Liver tissues (scale bar, 200 $\mu$ m) were collected at 4 hours post-reperfusion and stained for HOCl-protein adducts (brown) in anti-Siglec-F-treated mice (C), as well as in PHIL (D) and  $\Delta$ dblGata1 mice (E). A two-tailed unpaired Student's t tests with Welch's correction was performed in E. A one-way ANOVA was performed in A and B.

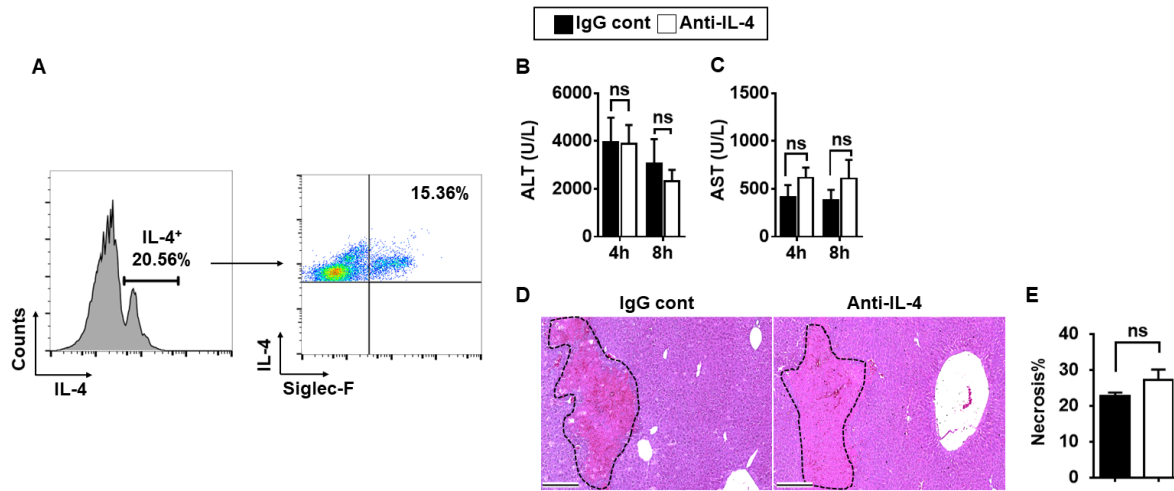

**Fig. S8. IL-4 is not required for the hepatoprotective function of eosinophils.** (A) Male C57BL/6 were subjected to ischemia and reperfusion. Liver non-parenchymal cells were isolated from WT mice at 4 hours post-reperfusion and stained for intracellular IL-4. IL-4-positive cells are gated, and the proportions of eosinophils (Siglec-F<sup>+</sup>) that express IL-4 among total IL-4<sup>+</sup> cells are shown ( $n = 4$  mice per group). (B-E) Male C57BL/6 ( $n = 3$  mice per group) were intraperitoneally injected with anti-IL-4 at 1 hour prior to ischemia. Serum concentrations of ALT (B) and AST (C) were measured at 4 and 8 hours after reperfusion. (D) Liver necrosis (scale bar, 200 μm) was examined at 24 hours post-reperfusion and quantified (E). A two-tailed unpaired Student's t tests with Welch's correction was performed in E. A two-way ANOVA was performed in B and C.



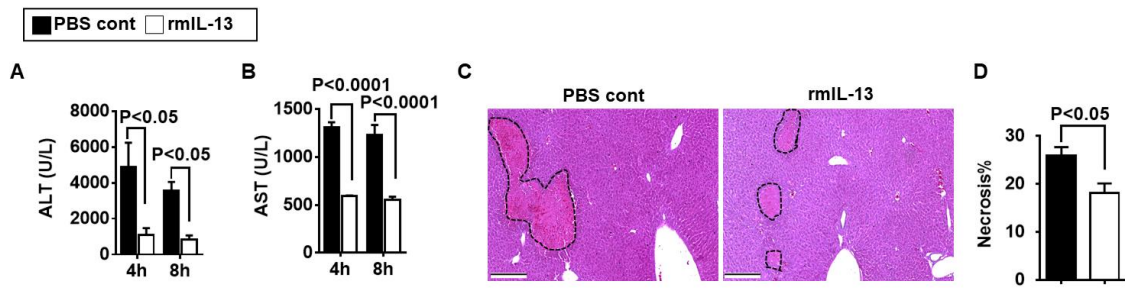

**Fig. S9. Recombinant mouse IL-13 reduces hepatic IR injury.** Male C57BL/6 mice were intravenously injected with recombinant mIL-13 at 1 hour prior to IR surgery ( $n = 3$  mice per group). Serum ALT (A) and AST (B) concentrations were measured at 4 and 8 hours post-reperfusion. Liver necrosis (scale bar, 200 $\mu$ m) was determined at 24 hours post-reperfusion (C) and quantified (D). A two-tailed unpaired Student's t tests with Welch's correction was performed in D. A two-way ANOVA was performed in A and B.

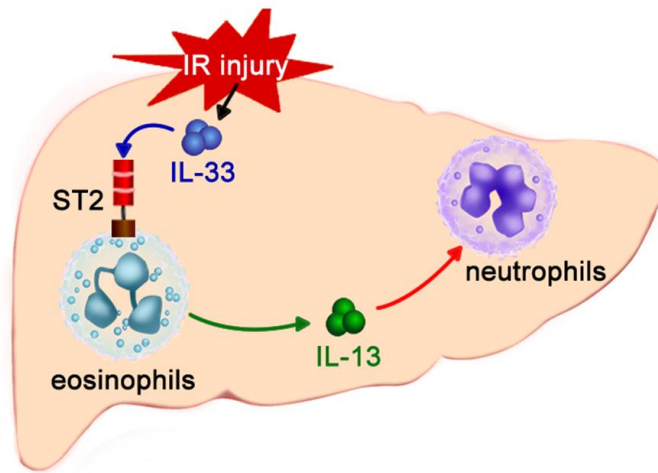

**Fig. S10. Schematic summary of the main findings.** Hepatic IR injury causes rapid accumulation of eosinophils in the liver. IL-33 signals through ST2 on eosinophils to induce IL-13 production. As the major source of IL-13, eosinophils suppress neutrophils and attenuate liver injury.
