# Supplementary material
Source: PubMed Central journal article supplement (PMC8167890)
Supplement: NIHMS1701463-supplement-Tables.pdf [file NIHMS1701463-supplement-Tables.pdf]

**Table S1. Donor characteristics.** BMI: body mass index; WIT: warm ischemia time; CIT: cold ischemia time; RT: reperfusion time; DBD: brain death. M: Male; F: Female.

| Patient ID | Study ID | Donor Age | Donor Sex | Donor BMI | WIT (min) | CIT (min) | RT (min) | Steatosis    | Graft type |
|------------|----------|-----------|-----------|-----------|-----------|-----------|----------|--------------|------------|
| P1         | 18       | 17        | F         | 23.5      | 47        | 177       | 264      | 0            | DBD        |
| P2         | 23       | 14        | F         | 22.7      | 36        | 240       | 126      | 0            | DBD        |
| P3         | 26       | 32        | M         | 31.4      | 61        | 526       | 205      | 0            | DBD        |
| P4         | 31       | 29        | M         | 37        | 40        | 479       | 84       | 10% Macro    | DBD        |
| P5         | 38       | 12        | F         | 19        | 45        | 417       | 237      | 10% Micro    | DBD        |
| P6         | 40       | 51        | F         | 27.9      | 48        | 428       | 197      | 1-2% Macro   | DBD        |
| P7         | 43       | 34        | F         | 26        | 48        | 286       | 425      | 5% Macro     | DBD        |
| P8         | 83       | 46        | F         | 47        | 53        | 452       | 167      | 25% Macro    | DBD        |
| P9         | 85       | 65        | F         | 42        | 42        | 333       | 111      | 0            | DBD        |
| P10        | 89       | 20        | M         | 27        | 46        | 253       | 165      | 0            | DBD        |
| P11        | 116      | 31        | F         | 31        | 38        | 360       | 131      | 5% Macro     | DBD        |
| P12        | 142      | 48        | F         | 46.5      | 40        | 356       | 171      | <5% Macro    | DBD        |
| P13        | 211      | 47        | M         | 27.4      | 45        | 220       | 159      | 0            | DBD        |
| P14        | 235      | 61        | F         | 37.3      | 37        | 563       | 117      | 50-60% Macro | DBD        |
| P15        | 247      | 61        | M         | 32.1      | 36        | 723       | 80       | 15-25% Macro | DBD        |
| P16        | 255      | 79        | F         | 22        | 40        | 147       | 122      | 5% Macro     | DBD        |
| P17        | 269      | 52        | M         | 30.7      | 47        | 433       | 300      | 0            | DBD        |
| P18        | 299      | 64        | M         | 21        | 42        | 323       | 118      | 0            | DBD        |
| P19        | 438      | 50        | M         | 30.6      | 39        | 431       | 241      | 15-25% Macro | DBD        |
| P20        | 468      | 69        | M         | 41.9      | 35        | 684       | 165      | 0            | DBD        |
| P21        | 474      | 50        | M         | 31.6      | 42        | 434       | 146      | 0            | DBD        |
| P22        | 525      | 23        | F         | 43.5      | 38        | 276       | 130      | 30% Macro    | DBD        |

**Table S2. Recipient characteristics.** BMI: body mass index; ETOH: alcohol; HBV: hepatitis B virus; HCC: hepatocellular carcinoma; AIH: autoimmune hepatitis; PSC: primary sclerosing cholangitis; HCV: hepatitis C virus; CMV: cytomegalovirus; NASH: non-alcoholic steato-hepatitis; MELD Score: model for end-stage liver disease score.; ALT: Alanine aminotransferase; Bili: bilirubin; INR: international normalized ratio.

| Patient ID | Study ID | Recipient Age | Recipient Sex | Recipient BMI | Cause of Liver Failure                                                 | MELD Score | ALT  | Bili | INR  |
|------------|----------|---------------|---------------|---------------|------------------------------------------------------------------------|------------|------|------|------|
| P1         | 18       | 43            | M             | 23.67         | ETOH                                                                   | 40         | 188  | 6.8  | 1.37 |
| P2         | 23       | 68            | M             | 29.72         | HBV/HCC                                                                | 23         | 187  | 4.9  | 1.98 |
| P3         | 26       | 62            | M             | 30.26         | HCV/HCC                                                                | 18         | 433  | 2.7  | 1.85 |
| P4         | 31       | 44            | F             | 22.51         | AIH/PSC                                                                | 23         | 2569 | 6.6  | 1.74 |
| P5         | 38       | 55            | M             | 28.12         | ETOH/End stage renal disease-received combined liver/kidney transplant | 23         | 108  | 3.9  | 1.32 |
| P6         | 40       | 74            | M             | 21.84         | HCV/HCC                                                                | 17         | 498  | 4.7  | 1.7  |
| P7         | 43       | 47            | M             | N/A           | Allograft Failure/CMV                                                  | 33         | 44   | 5.3  | 1.44 |
| P8         | 83       | 68            | F             | 29.04         | ETOH                                                                   | 22         | 2096 | 3.4  | 2.22 |
| P9         | 85       | 49            | F             | 46.51         | HCV                                                                    | 20         | 330  | 6.1  | 1.6  |
| P10        | 89       | 27            | F             | 52.57         | AIH                                                                    | 40         | 190  | 14.3 | 1.33 |
| P11        | 116      | 56            | M             | 28.99         | ETOH                                                                   | 18         | 156  | 2.9  | 1.68 |
| P12        | 142      | 62            | F             | 38.19         | HCV                                                                    | 23         | 398  | 9.9  | 2.22 |
| P13        | 211      | 54            | F             | 55.43         | AIH                                                                    | 40         | 331  | 3.4  | 1.93 |
| P14        | 235      | 73            | F             | 27.51         | NASH                                                                   | 22         | 201  | 4    | 1.83 |
| P15        | 247      | 64            | M             | 41.35         | NASH/HCC                                                               | 28         | 986  | 1.6  | 1.49 |
| P16        | 255      | 76            | M             | 27.11         | NASH                                                                   | 21         | 128  | 3.8  | 1.51 |
| P17        | 269      | 65            | M             | 27.03         | ETOH/NASH/HCC                                                          | 21         | 604  | 7.9  | 1.41 |
| P18        | 299      | 49            | M             | 59.41         | NASH                                                                   | 36         | 211  | 10.5 | 3.28 |
| P19        | 438      | 64            | F             | 21.99         | HCV/ETOH                                                               | 30         | 4208 | 2.6  | 1.75 |
| P20        | 468      | 46            | M             | 37.32         | ETOH                                                                   | 28         | 587  | 6.2  | 1.71 |
| P21        | 474      | 62            | F             | 27            | NASH                                                                   | 38         | 698  | 9.9  | 1.73 |
| P22        | 525      | 58            | M             | 32.2          | NASH                                                                   | 40         | 161  | 21.6 | 1.9  |
